1 **Aggressive but not reproductive boldness in male green anole lizards**  
2 **correlates with baseline vasopressin activity**

3

4 David Kabelik<sup>\*1</sup>, Allison R. Julien<sup>1</sup>, Brandon R. Waddell<sup>1</sup>; Mitchell A. Batschelett<sup>1</sup>; Lauren A.  
5 O'Connell<sup>2</sup>

6 <sup>1</sup>Department of Biology & Program in Neuroscience, Rhodes College, Memphis TN 38112 USA

7 <sup>2</sup>Department of Biology, Stanford University, Stanford, CA, 94305, USA

8

9 Key words: vasotocin, reptile, lizard, steroid hormones

10

11 \* Please send correspondence to:

12 David Kabelik  
13 Department of Biology  
14 Rhodes College  
15 2000 N Parkway  
16 Memphis, TN 38112  
17 USA  
18 kabelikd@rhodes.edu  
19 901-843-3699 (phone)  
20 901-843-3565 (fax)

21

22 **Abstract**

23           Across species, individuals within a population differ in their level of boldness in social  
24 encounters with conspecifics. This boldness phenotype is often stable across both time and  
25 social context (e.g., reproductive versus agonistic encounters). Various neural and hormonal  
26 mechanisms have been suggested as underlying these stable phenotypic differences, which are  
27 often also described as syndromes, personalities, and coping styles. Most studies examining  
28 the neuroendocrine mechanisms associated with boldness examine subjects after they have  
29 engaged in a social interaction, whereas baseline neural activity that may predispose behavioral  
30 variation is understudied. The present study tests the hypotheses that physical characteristics,  
31 steroid hormone levels, and baseline variation in Ile<sup>3</sup>-vasopressin (VP, a.k.a., Arg<sup>8</sup>-vasotocin)  
32 signaling predispose boldness during social encounters. Boldness in agonistic and reproductive  
33 contexts was extensively quantified in male green anole lizards (*Anolis carolinensis*), an  
34 established research organism for social behavior research that provides a crucial comparison  
35 group to investigations of birds and mammals. We found high stability of boldness across time,  
36 and between agonistic and reproductive contexts. Next, immunofluorescence was used to  
37 colocalize VP neurons with phosphorylated ribosomal protein S6 (pS6), a proxy marker of  
38 neural activity. Vasopressin-pS6 colocalization within the paraventricular and supraoptic nuclei  
39 of the hypothalamus was inversely correlated with boldness of aggressive behaviors, but not of  
40 reproductive behaviors. Our findings suggest that baseline vasopressin release, rather than  
41 solely context-dependent release, plays a role in predisposing individuals toward stable levels of  
42 displayed aggression toward conspecifics by inhibiting behavioral output in these contexts.

## 43 **Introduction**

44           Humans are often described as being introverted, extraverted, or somewhere in  
45 between. Such variation in a stable boldness measure similarly exists within numerous animal  
46 species, and has also been described as a behavioral syndrome, personality, or coping style  
47 (Koolhaas et al., 2010; Réale et al., 2010; Sih et al., 2004). These terms encapsulate the notion  
48 of linked social traits that are expressed across various environments, including both social and  
49 nonsocial contexts. Indeed, evidence in some species demonstrates heritability of displayed  
50 boldness (Ballew et al., 2017; Mont et al., 2018; Scherer et al., 2017), suggesting a genetic  
51 basis for the stability of individual differences across time. Likewise, the level of an individual's  
52 boldness is often consistent across social contexts (Colléter and Brown, 2011; Koolhaas et al.,  
53 2010; Qu et al., 2018; Reaney and Backwell, 2007), where individuals that may be shy within a  
54 reproductive social encounter may also be shy within an agonistic encounter (Kabelik et al.,  
55 2021). Such consistency of behavioral phenotype hints at common neural mechanisms  
56 regulating boldness across a variety of contexts.

57           The mechanisms that underlie boldness during social encounters likely involve the social  
58 decision-making network (Newman, 1999; O'Connell and Hofmann, 2012, 2011) and its various  
59 neuroendocrine mediators (Baugh et al., 2012; Félix et al., 2020; Ketterson and Nolan Val,  
60 1999) that are conserved across vertebrates. The mediators linked to individual variability in  
61 behavioral phenotype include steroid hormones (Koolhaas et al., 2010; Sluyter et al., 1996;  
62 Tudorache et al., 2018; Veenema et al., 2004, 2003), various neuropeptide and  
63 neurotransmitter systems (Thörnqvist et al., 2019; Veenema et al., 2004), and their associated  
64 receptors (Alfonso et al., 2019; Kabelik et al., 2021; Kanitz et al., 2019). Although much of the  
65 research on the neuroendocrine basis of boldness in social contexts has been conducted in  
66 mammals and fish, here we examine these traits in a reptilian model system, the green anole  
67 lizard (*Anolis carolinensis*). The study of behavioral neuroscience in reptiles lags behind that of

68 other vertebrate groups and invertebrates (Kabelik and Hofmann, 2018; Taborsky et al., 2015),  
69 despite lizards being important for evolutionary comparisons among animal taxa, especially  
70 amniotic vertebrates (mammals, birds, and reptiles). Green anoles are a longstanding model for  
71 behavioral neuroendocrinology research (Lovern et al., 2004) due to their readily quantifiable  
72 social behavioral displays, natural seasonal variability in hormone levels, and natural stress  
73 responsivity. A social decision-making network has been described in reptiles (Kabelik et al.,  
74 2018), and boldness has been shown to be stable across contexts and over time in anole lizard  
75 studies (Kabelik et al., 2021; Putman et al., 2019).

76 Various neuroendocrine variables have been related to the expression of social  
77 behaviors in lizards, including neuropeptides and sex steroid hormones (Dunham and  
78 Wilczynski, 2014; Hartline et al., 2017; Kabelik et al., 2013, 2008b; Kabelik and Crews, 2017;  
79 Kabelik and Magruder, 2014; Korzan et al., 2001; Korzan and Summers, 2004; Larson and  
80 Summers, 2001; Smith and Kabelik, 2017; Watt et al., 2007; Woolley et al., 2004a, 2004b,  
81 2001). Here, we focus on the potential regulation of boldness by the vasopressin (VP; Ile<sup>3</sup>-  
82 vasopressin, a.k.a. Arg<sup>8</sup>-vasotocin) system, as well as circulating steroid hormones.  
83 Vasopressin has been shown to have various effects on social behavioral expression, and  
84 stress reactivity, across species (Albers, 2015; Carter, 2017; Goodson and Kabelik, 2009; Kelly  
85 et al., 2011; Kelly and Goodson, 2014a; Walton et al., 2010; Wilczynski et al., 2017). Depending  
86 where in the brain VP is released, the effects on social behavior may be completely opposed to  
87 each other, such as in the case of displayed aggression in rats (Veenema et al., 2010).  
88 Research in anole lizards suggests that VP has an inhibitory effect on components of the social  
89 decision-making network (Kabelik et al., 2018). Although many studies focus on activity of VP  
90 neurons and receptors during a social encounter (e.g., Kabelik et al., 2013), information about  
91 baseline activity of VP neurons in individuals varying in boldness is unknown.

92           Here, we test three hypotheses about the regulation of boldness with social contexts of  
93 male green anoles. First, we test the hypothesis that the physical size of males relates to their  
94 boldness during social encounters. Body size has been shown to be predictive of boldness in  
95 some but not all species (Adriaenssens and Johnsson, 2011; Brown and Braithwaite, 2004;  
96 Mayer et al., 2016; Smith and Blumstein, 2010), and thus we predicted either a positive  
97 association or no association between these variables. Second, we test the hypothesis that  
98 circulating levels of steroid hormones regulate boldness within social behavior interactions. As  
99 testosterone and progesterone have been linked to aggression (Kabelik et al., 2008b; Weiss  
100 and Moore, 2004) and glucocorticoids to boldness in other species (Koolhaas et al., 2010;  
101 Sluyter et al., 1996), we predicted that steroid hormone levels would predict behavioral boldness  
102 in the present study. Third, we tested the hypothesis that central release of VP modulates  
103 boldness within social interactions. As VP is associated with both affiliative and agonistic  
104 behavior (Kelly and Goodson, 2014b), we predicted a relationship between these variables, but  
105 not predict a specific direction of this correlation.

106           We first examined the stability of boldness in both reproductive and agonistic  
107 encounters across a period of two weeks. We then waited for one day before collecting blood  
108 samples and brains to eliminate neuroendocrine changes correlated with recent participation in  
109 a social behavior interaction. We quantified hormone levels via enzyme-linked immunosorbent  
110 assay and used immunofluorescence to label VP neurons and their colocalization with  
111 phosphorylated ribosomal protein S6 (pS6), a proxy marker of neural activation in response to  
112 stimulation, as well as baseline neural activity (Cao et al., 2011; Klingebiel et al., 2017; Knight et  
113 al., 2012). We predicted that circulating steroid hormone levels and the baseline activity of VP  
114 neurons (%VP-pS6 colocalization) would reflect the neuroendocrine state that predisposes that  
115 individual toward boldness or shyness.

116

## 117 **Materials and Methods**

### 118 *Subjects*

119           Twenty-two male green anoles (*Anolis carolinensis*) were obtained from a commercial  
120 supplier and served as our focal subjects. They were singly housed for three weeks prior to  
121 experimentation within terraria (30.5 cm H x 26 cm W x 51 cm L) and kept in breeding season  
122 conditions: long-day (14 light:10 dark) full-spectrum lighting, 12 hours of supplemental heat  
123 provided 5 cm above one end of a wire-mesh terrarium lid by means of a 60-W incandescent  
124 light bulb. Animals were fed three times per week with crickets and cages were misted twice-  
125 daily with deionized water. Additional males and females from our housing colony were used as  
126 stimulus animals in social interactions. All procedures involving live animals were conducted  
127 according to federal regulations and approved by the Institutional Animal Care and Use  
128 Committee at Rhodes College.

129

### 130 *Behavior assays*

131           Behavioral trials were carried out in May and June of 2013. Focal males were assessed  
132 for boldness within two social encounter scenarios – a reproductive encounter with two adult  
133 conspecific females and an agonistic encounter with a size-matched (within 3 mm snout-vent  
134 length) conspecific stimulus male. In each case, the stimulus animals were placed into the focal  
135 male's terrarium and behaviors were scored for 10 minutes. Two females were used in the  
136 reproductive encounter to maximize the probability of eliciting reproductive behaviors from the  
137 focal male. We recorded the frequency (sum of behaviors per 10-min session) and latency to  
138 first performance (minute of first occurrence of any listed behavior) of the following behaviors:  
139 head bob bout, push-up bout, dewlap extension bout, dewlap extension bout with push up,  
140 chase, and copulate. Focal males that failed to display any behaviors were assigned the

141 maximum latency score of 10 min. The maximum intensity of behavioral display was also  
142 scored from 0-4 based on the highest achieved category: no display, headbob only, pushup  
143 and/or dewlap display, chase, and copulate. Behaviors in the agonistic encounter were scored  
144 as in the reproductive encounter, except that biting of the stimulus male replaced copulation as  
145 the highest intensity behavior.

146 The reproductive encounter was conducted with three separate pairs of females and the  
147 agonistic encounter with three separate stimulus males over the course of a week. Only one trial  
148 was conducted per day. Stimulus animals were only used once per day. The entire procedure  
149 was then repeated during the subsequent week, toward the same three pairs of females and the  
150 same three stimulus males. Conducting the behavioral observations a second time allowed us  
151 to determine the stability of each boldness measure across time.

152

### 153 *Bold-shy categorization*

154 To generate each boldness score, we conducted principal components analyses (PCA)  
155 to reduce the average behavioral latency, frequency, and intensity scores from the given  
156 encounter scenarios (reproductive or agonistic), separately for week 1 and for week 2, each into  
157 a single value. For example, in male-female trials from week 1, the behavioral latency,  
158 frequency, and intensity scores for each focal male were averaged across the three trials to  
159 generate an “average reproductive latency”, “average reproductive frequency”, and “average  
160 reproductive intensity” score. These average scores were then included in the PCA and  
161 generated a single PCA component that we here call BoldnessToFemalesWeek1. In each  
162 scenario, the resulting analysis generated a single PCA component with an eigenvalue > 1, and  
163 in each case, this component was highly positively correlated with average frequency and  
164 intensity scores, and negatively with average latency scores ( $r > \pm 0.80$ ,  $p < 0.001$  for each).

165 BoldnessToFemalesWeek1 explained 81% of the behavioral variation in those trials,  
166 BoldnessToFemalesWeek2 (from week 2 data) explained 75% of the variation from those data,  
167 BoldnessToMalesWeek1 (from week 1 agonistic encounters) explained 83% of the variation in  
168 those data, and BoldnessToMalesWeek2 explained 85% of the variation in behavioral  
169 frequency, latency, and intensity values from the week 2 agonistic encounter data. As week 1  
170 and week 2 data were highly correlated, we also created a variable that averaged reproductive  
171 boldness from weeks 1 and 2 (AverageBoldnessToFemales), as well as agonistic boldness from  
172 weeks 1 and 2 (AverageBoldnessToMales).

173

#### 174 *Tissue harvesting*

175 Prior to handling for blood and brain harvesting, focal subjects were left undisturbed in  
176 their home terraria for 1 day following their last behavioral trial. We euthanized focal males by  
177 cutting through the spinal column and immediately collected trunk blood for hormone analyses  
178 (average collection time from first handling was  $162 \pm 3.2$  s). The blood was kept at 4°C until  
179 centrifugation. The brain was then rapidly dissected and fixed by overnight submersion in 4%  
180 paraformaldehyde in 0.1 M phosphate buffer at 4°C, followed by cryoprotection with 30%  
181 sucrose in 0.1 M phosphate-buffered saline (PBS). The body (minus the head) was then  
182 weighed, after which the testes were dissected from the body and weighed. Brains were  
183 sectioned into two series, at a section thickness of 50  $\mu$ m, on a Microm HM 520 cryostat  
184 (Thermo Scientific).

185

#### 186 *Hormone analyses*

187 Blood samples were centrifuged and plasma (averaging  $62 \pm 2.7$   $\mu$ l) was frozen at -80°C  
188 until hormone analysis. We quantified testosterone (ADI-900-065; sensitivity 5.67 pg/mL),



189 estradiol (ADI-900-008; sensitivity 28.5 pg/mL), progesterone (ADI-900-011; sensitivity 8.57  
190 pg/mL), and cortisol (ADI-900-071; sensitivity 56.72 pg/mL) using enzyme-linked  
191 immunosorbent assay (ELISA) kits (Enzo Life Sciences, Farmingdale, NY). The cortisol kit  
192 cross-reacts with corticosterone at 28%, representing a general glucocorticoid assay, albeit with  
193 lower-than-typical sensitivity. We re-suspended 7  $\mu$ l of plasma in 203  $\mu$ L of the appropriate  
194 assay buffer and ran each sample in duplicate as per manufacturer's instructions. Samples  
195 were run across two plates for each hormone and the inter-assay variation across plates and  
196 the intra-assay variance for each plate is as follows: testosterone (inter: 5.6%; intra: 5.6% and  
197 6.1%), estradiol (inter: 4.1%; intra: 3.7% and 8.5%), progesterone (inter: 4.7%; intra: 2.3% and  
198 4.7%), and cortisol (inter: 6.4%; intra: 3.8% for both plates). Five samples were inadvertently  
199 excluded from the analysis. Hormone results were generally consistent with previously reported  
200 levels in this species (Greenberg and Crews, 1990; Young et al., 1991).

201

## 202 *Immunohistochemistry*

203 Immunohistochemical processing was conducted as in previous studies (Hartline et al.,  
204 2017; Kabelik et al., 2018, 2014, 2013; Kabelik and Magruder, 2014). Briefly, we processed one  
205 series of brain sections with 1:250 dilution of rabbit anti-pS6 antibody (#2211, Cell Signaling  
206 Technology), 1:5000 dilution of guinea pig anti-vasopressin antibody (T-5048, Peninsula  
207 Laboratories), and 1:2000 dilution of sheep anti-tyrosine hydroxylase antibody (NB300-110,  
208 Novus Biologicals; part of a separate study). The sections were subsequently processed with  
209 donkey anti-sheep secondary antibody conjugated to Alexa Fluor 488 at 3  $\mu$ l/ml and (Life  
210 Technologies), donkey-anti rabbit secondary antibody conjugated to Alexa Fluor 555 at 5  $\mu$ l/ml  
211 (Life Technologies), and donkey-anti guinea pig DyLight 647 at 16  $\mu$ l/ml (Jackson  
212 ImmunoResearch). Preadsorption with excess VP (4100576, Bachem) and pS6 blocking  
213 peptide (1220S, Cell Signaling Technology) antibody eliminated signal (**Supplementary Fig. 1**).

214 We targeted pS6 rather than Fos because preliminary research demonstrated extremely low  
215 levels of Fos expression within VP neurons under baseline conditions.

216

### 217 *Microscopy and Image Analyses*

218 An LSM 700 Confocal microscope and Zen 2010 software (Carl Zeiss), using a 20X  
219 objective, were used to capture z-stacks of photomicrographs at 5  $\mu\text{m}$  intervals, in a grid that  
220 was later stitched together. A maximum intensity projection created a two-dimensional image.  
221 Individual colors were exported as separate layers using AxioVision 4.8 (Carl Zeiss), and these  
222 were stacked as overlaid monochromatic layers in Photoshop (Adobe Systems). Layers in the  
223 stack could thus be toggled on and off to determine signal colocalization. Analyses were  
224 conducted by individuals unaware of treatment groups.

225 We examined VP cells within the paraventricular nucleus (PVN) and the supraoptic  
226 nucleus (SON) of the hypothalamus (**Fig. 1**). Only cells that could be clearly visualized with VP-  
227 signal in the cytoplasm and a darker nucleus were examined. VP cell counts could not be  
228 accurately obtained due to damage to some tissue sections and many overlapping cells,  
229 especially within the SON. We estimated VP cell density by examining the average number of  
230 cells per section across the three most densely populated sections. An average of  $39.32 \pm 4.93$   
231 (mean  $\pm$  S.E.) cells in the PVN and  $28 \pm 5.85$  cells in the SON were analyzed per subject.

232

### 233 *Statistical analyses*

234 Statistical analyses (Pearson's correlations; repeated-measures analysis of variance,  
235 ANOVA; Friedman test; PCA) were run using IBM SPSS (version 22). Corrections for multiple  
236 comparisons were made using Benjamini-Hochberg calculations (Benjamini and Hochberg,  
237 1995). Scatterplots and boxplots were made with ggplot2 (version 3.3.3) in RStudio (version

238 1.4.1106) running R (version 4.1.0). Hormone levels were ln-transformed to meet assumptions  
239 of parametric analyses.

240

## 241 **Results**

### 242 *Boldness is stable over time and correlated across contexts*

243 Relative boldness was found to be stable across weeks (**Fig. 2**).  
244 BoldnessToMalesWeek1 was highly correlated with BoldnessToMalesWeek2 ( $r=0.57$ ,  $N=22$ ,  
245  $p=0.005$ ). This was despite a general drop in aggression frequency and intensity, and rise in  
246 aggression latency across the six testing sessions, possibly due to habituation ( $p<0.01$  for all  
247 three variables, see **Supplementary Figs. 2-4**). Similarly, BoldnessToFemalesWeek1 was  
248 highly correlated with BoldnessToFemalesWeek2 ( $r=0.72$ ,  $N=22$ ,  $p<0.001$ ). Reproductive  
249 behavior frequency, intensity, and latency did not differ across testing sessions ( $p>0.05$  for all,  
250 see **Supplementary Figs. 5-7**). Because the week 1 and week 2 boldness PCA scores were  
251 highly correlated, the average scores from both weeks were then used to compare boldness  
252 across social contexts, where AverageBoldnessToFemales correlated strongly with  
253 AverageBoldnessToMales ( $r=0.65$ ,  $N=22$ ,  $p=0.001$ ).

254

### 255 *Boldness is generally not correlated with physical traits or steroid hormone levels*

256 Boldness to males and females was unrelated to physical or hormonal measures except  
257 for a positive correlation between testes mass and AverageBoldnessToFemales (**Table 1**).  
258 Similarly, neither VP-pS6 colocalization within the PVN, nor in the SON, correlated with any  
259 physical characteristics or hormone levels ( $p>0.05$  for all).

260

261 **Table 1.** Results of correlations between measures of boldness and physical and hormonal  
 262 measures. Displayed are the Pearson correlation coefficient (r), the sample size (N), and the  
 263 probability of significance (P). No correlations were significant following correction for multiple  
 264 comparisons.

|                            | AverageBoldnessToMales |    |      | AverageBoldnessToFemales |    |       |
|----------------------------|------------------------|----|------|--------------------------|----|-------|
|                            | r                      | N  | P    | r                        | N  | P     |
| <b>Physical Variables:</b> |                        |    |      |                          |    |       |
| snout-vent length (mm)     | -0.02                  | 22 | 0.94 | -0.13                    | 22 | 0.55  |
| body-minus-head mass (g)   | -0.10                  | 22 | 0.67 | -0.10                    | 22 | 0.67  |
| testes mass (g)            | 0.31                   | 22 | 0.16 | 0.47                     | 22 | 0.026 |
| testosterone (ng/ml)       | 0.21                   | 17 | 0.42 | 0.29                     | 17 | 0.25  |
| estradiol (ng/ml)          | 0.12                   | 17 | 0.65 | 0.31                     | 17 | 0.22  |
| progesterone (ng/ml)       | 0.12                   | 17 | 0.65 | 0.28                     | 17 | 0.28  |
| glucocorticoids (ng/ml)    | -0.20                  | 17 | 0.45 | 0.17                     | 17 | 0.51  |

265

266 *Boldness to males was associated with vasopressin activity in the PVN*

267 AverageBoldnessToMales was negatively correlated with VP-pS6 colocalization (**Fig. 3**)

268 within the PVN ( $r=-0.51$ ,  $N=22$ ,  $p=0.014$ ) and the SON ( $r=-0.52$ ,  $N=22$ ,  $p=0.014$ ).

269 AverageBoldnessToFemales was not correlated with VP-pS6 colocalization in either the PVN

270 ( $r=-0.24$ ,  $N=22$ ,  $p=0.29$ ) or the SON ( $r=-0.09$ ,  $N=22$ ,  $p=0.69$ ).

271

272 *Boldness to males and females was not associated with measures of total VP cell number*

273 The average PVN VP cell density across the three most densely populated sections was

274 unrelated to displayed boldness to males ( $r=-0.05$ ,  $N=22$ ,  $p=0.84$ ) and females ( $r=0.22$ ,  $N=22$ ,

275  $p=0.33$ ). This was likewise true for SON VP cell density and displayed boldness to males ( $r=-$

276  $0.19$ ,  $N=20$ ,  $p=0.42$ ) and females ( $r=-0.02$ ,  $N=20$ ,  $p=0.95$ ). Similar analyses for average VP

277 counts per section, or VP counts on the single most densely populated section likewise showed

278 no relationship to displayed boldness ( $p>0.27$  for all).

279

280 **Discussion**

281           In this study, we tested the hypotheses that physical size, circulating steroid hormone  
282 levels, and central release of VP regulate displayed boldness in reproductive and agonistic  
283 social encounters. Our results support the third hypothesis, where baseline levels of VP activity  
284 are associated with boldness of male green anoles within an agonistic context, presumably due  
285 to differential levels of VP release. However, our results do not support our first two hypotheses  
286 relating to physical size and steroid hormones levels being associated with boldness. We also  
287 demonstrate that boldness in male green anoles is stable across social contexts and time.

288           Vasopressin is a neuromodulator that has previously been shown to have causal effects  
289 on aggression (Kelly and Goodson, 2014b; Terranova et al., 2017), and our study supports the  
290 notion that basal VP activity helps to determine individual differences in aggressive behavior  
291 output. Our results are in line with previous findings showing a negative correlation between  
292 neuronal VP activity and activation of social decision-making network nodes in the closely  
293 related brown anole, especially within agonistic contexts (Kabelik et al., 2018). Interestingly,  
294 although boldness measures are correlated between agonistic and reproductive contexts, VP  
295 activity does not correlate well with reproductive boldness suggesting that other mechanisms  
296 may underlie the cross-context correlation.

297

### 298 *Stability of boldness*

299           Our results demonstrate stability of displayed boldness across weeks and social  
300 contexts. The correlation of boldness scores across contexts suggests a shared neural network  
301 that regulates general social behavioral output. Correlated boldness measures are often  
302 referred to as behavioral syndromes (Colléter and Brown, 2011; Koolhaas et al., 2010; Qu et al.,  
303 2018; Reaney and Backwell, 2007). The stability of boldness across time, on the other hand,  
304 supports the notion that these traits are at least partly hard-wired, as would be expected if

305 boldness has strong heritable components, as has been suggested by previous studies (Ballew  
306 et al., 2017; Mont et al., 2018; Scherer et al., 2017). Various selective pressures appear to  
307 maintain variability in exhibited boldness within populations (Koolhaas et al., 2010; Smith and  
308 Blumstein, 2010).

309

310 *Boldness is unrelated to physical characteristics*

311 Although a relationship between body size and boldness has been demonstrated in  
312 reptiles, this relationship was observed in juvenile keelback snakes emerging from shelter (e.g.,  
313 Mayer et al., 2016), and we did not find any such relationships in the present study of adult  
314 green anoles. Instead, our results were very much in line with those of Kabelik et al. (2021),  
315 where boldness of social displays was not found to correlate with measures of body size. This  
316 was true for both boldness within agonistic and reproductive contexts. The one physical variable  
317 that did show a correlation trend with boldness was testes mass. However, this result is  
318 inconsistent with the findings of Kabelik et al. (2021) that included a larger sample size and did  
319 not find any such relationship. Moreover, the present finding did not survive correction for  
320 multiple comparisons.

321

322 *Boldness is unrelated to circulating steroid hormone levels*

323 We predicted that glucocorticoids would correlate with boldness in green anole lizards  
324 based on studies that found differences in glucocorticoid levels between individuals differing in  
325 active versus passive coping styles (Koolhaas et al., 2010; Sluyter et al., 1996). However, as in  
326 Kabelik et al. (2021), we found no relationship between circulating glucocorticoid levels and  
327 displayed boldness during social interactions in the present green anole study. It is nevertheless  
328 important to note that our hormone measures were from baseline diurnal plasma samples, and

329 thus we cannot exclude the possibility that nocturnal or stress-evoked glucocorticoid levels may  
330 still relate to exhibited boldness. This is especially true given the fact that VP is a releasing  
331 hormone for adrenocorticotrophic hormone, including in birds (Cornett et al., 2013), thus  
332 suggesting a similarly conserved role in reptiles.

333 We originally also hypothesized that sex steroid hormones may influence boldness in  
334 male green anoles because previous lizard studies demonstrated their involvement in the  
335 regulation of social behaviors. For instance, in male tree lizards, circulating testosterone  
336 correlates with aggression (Kabelik et al., 2006) and testosterone and progesterone treatments  
337 causally promote aggression (Kabelik et al., 2008b; Weiss and Moore, 2004). Additionally, in  
338 male brown anoles, the anti-androgen cyproterone acetate reduced display behaviors toward  
339 conspecific males and females (Tokarz, 1995). In male side-blotched lizards, the more  
340 aggressive morph type has also been shown to possess higher levels of testosterone (Sinervo  
341 et al., 2000). However, in the present study, we did not find any correlations between baseline  
342 sex steroid hormone levels and measures of displayed boldness within social contexts, which is  
343 in line with Kabelik et al. (2021). However, that study did detect differences in androgen receptor  
344 expression in the ventromedial hypothalamus between bold and shy males, suggesting that  
345 activational androgen signaling may nevertheless be involved in regulating the boldness of  
346 social behaviors. Furthermore, organizational sex steroid levels likely also play a role in  
347 determining levels of adult boldness.

348

#### 349 *Building upon previous VP research in reptiles*

350 Previous research examining VP cell numbers and optical densities in tree lizards found  
351 no correlations with aggression frequency or intensity (Kabelik et al., 2008c). However, other  
352 lizard studies provided findings suggestive of an involvement of VP in the regulation of social

353 behaviors. For instance, neural VP expression was found to be higher in dominant green anoles  
354 than in subordinate animals (Hattori and Wilczynski, 2009). Furthermore, rather than solely  
355 examining VP expression, a brown anole study examining the colocalization of VP neurons with  
356 Fos (another measure of neural activity) showed increased activation of these neurons following  
357 sexual and aggressive behavioral encounters (Kabelik et al., 2013). While these studies found  
358 links between VP activity and behavior, it was not clear whether VP activity causally impacted  
359 behavioral expression, or whether neural input from the perception of and interaction with a  
360 conspecific may have led to the observed changes. The goal of the present study was thus to  
361 examine VP neuron activity in the absence of a conspecific, but within male green anoles whose  
362 stable boldness was established. Although not a test of causality, this approach allows us to  
363 ascertain the state of the vasopressinergic activity that likely precedes a behavioral encounter to  
364 predispose individuals toward greater or lesser behavioral expression once a conspecific is  
365 perceived. It should be noted, however, that the repeated testing to establish boldness could  
366 itself have long-lasting effects on VP chemoarchitecture and activity, much like the androgenic  
367 changes observed in the winner effect seen in some species (Fuxjager and Marler, 2010).

368 Experiments directly testing the causality of VP on behavior in lizards have also been  
369 conducted, though with inconclusive results (Campos et al., 2020; Dunham and Wilczynski,  
370 2014). This may be partially due to logistic difficulties of targeted central injections, as these  
371 manipulations were via intraperitoneal injection. Thus, the resultant effects may be indirect due  
372 to peripheral binding of VP to smooth muscle, kidney, or pituitary receptors, rather than direct  
373 central manipulations. These green anole studies collectively found that VP manipulation  
374 decreased aggressive display to a mirror (though not to a conspecific), increased tongue flicking  
375 and chemical display, but also circulating glucocorticoid levels (the effects of which are then  
376 difficult to disentangle from those of VP itself). In another study, intraperitoneal administration of



377 VP and the VP receptor antagonist Manning compound both failed to alter displayed aggression  
378 to a conspecific in male tree lizards (Kabelik, 2006).

379         Related to the present study, a recent green anole study examined gene expression in  
380 various brain regions of the five most bold and five most shy males from a distribution of fifty-  
381 seven animals (Kabelik et al., 2021). Interestingly, rather than regions containing VP neurons,  
382 the area containing the most expression differences between bold and shy males was the  
383 ventromedial hypothalamus. The androgen receptor was among the genes differentially  
384 expressed in this region, with increased expression in bold males. Testosterone, a ligand for  
385 these receptors, is known to regulate aggression-associated VP receptors in the ventrolateral  
386 hypothalamus (Delville et al., 1996). Androgens may also regulate VP receptors in the lateral  
387 ventromedial hypothalamus, a region both containing high densities of androgen receptors and  
388 showing aggressive display-induced activation in lizards (Kabelik et al., 2008a; Rosen et al.,  
389 2002). Unfortunately, due to a lack of VP gene annotation in the green anole genome, the  
390 Kabelik et al. (2021) study could not determine whether nonapeptides including VP were  
391 differentially expressed between bold and shy males, though no differences in VP receptor  
392 expression in the ventromedial hypothalamus was detected.

393

#### 394 *Ties to VP research in other vertebrate taxa*

395         Apart from VP activity, the number of VP neurons present in a brain region also  
396 influences the amount of VP that can be released from that cell population. The number of VP  
397 neurons present in the bed nucleus of the stria terminalis of certain songbird species (as well as  
398 VP receptor densities in the lateral septum, a target site of these neurons) correlates positively  
399 with the degree of sociality (ranging from territorial to colonial) of the species (Goodson et al.,  
400 2006; Goodson and Wang, 2006). However, VP cells in the bed nucleus of the stria terminalis

401 were barely detectable in a related brown anole study (Kabelik et al. 2013), and we were not  
402 able to discern any VP cells in that brain region in this green anole study. Vasopressin neurons  
403 of the PVN also play a related role in the regulation of social behaviors (Kelly and Goodson,  
404 2014c) and knockdown of these neurons reduces gregariousness and alters displayed  
405 aggression in zebra finches (Kelly and Goodson, 2014a). Within the latter study, knockdown of  
406 VP in the PVN of male zebra finches caused increased aggression to opposite-sex individuals,  
407 while the same manipulation resulted in decreased aggression in females. While our study  
408 found no effects of neuron number within the PVN (or SON) on boldness, our results are  
409 nevertheless in line with those of Kelly and Goodson (2014a). Here, VP activity in the green  
410 anole PVN was correlated with decreased boldness in aggressive encounters (albeit toward a  
411 same-sex individual), which is consistent with those neurons reducing aggression in male zebra  
412 finches. However, the role of PVN VP neurons is complex, difficult to understand, and likely both  
413 sex- and species-specific. For instance, findings in male song sparrows find increased PVN VP  
414 activation following participation in a simulated agonistic encounter (Goodson and Evans, 2004),  
415 and aggression intensity is positively associated with PVN VP activity in male brown anoles  
416 (Kabelik et al., 2013). However, in goldfish, VP inhibits social approach when released within a  
417 hindbrain circuit (Thompson and Walton, 2004; Walton et al., 2010), which may be separate  
418 from forebrain circuitry regulating agonistic and anxiety related behaviors. This notion of  
419 separate cell groups exerting separate functions on social behavior is further supported in fish  
420 by work on African cichlids, where VP expression was found to be higher in gigantocellular cells  
421 of territorial than nonterritorial males, though a reverse finding was present in parvocellular  
422 neurons (Greenwood et al., 2008). Both of these cell groups are found within the preoptic area,  
423 an ancestral common region of VP production which gave rise to separate disparate populations  
424 in amniotes (Goodson and Kabelik, 2009). In amniotes, both magnocellular and parvocellular  
425 VP neurons are present in the PVN (Kabelik et al., 2008c; Kawakami et al., 2021; Panzica et al.,  
426 1999), and this heterogeneity of cell types with separate functions may be one reason for the

427 different functions and behavioral relationships attributed to VP neurons of the PVN across  
428 studies.

429

## 430 **Conclusions**

431 Boldness of social interactions in male green anoles was found to be stable across  
432 weeks, as well as between agonistic and reproductive contexts. Baseline levels of VP activity  
433 (VP-pS6 colocalization) within both the PVN and SON were found to correlate inversely with the  
434 boldness of aggression toward males, though not with reproductive boldness toward females.  
435 Boldness was unrelated to measures of body size, circulating levels of glucocorticoids or sex  
436 steroids, or measures of VP cell number in the PVN and SON. The finding that VP activity  
437 correlates inversely with boldness suggests that VP modulates portions of the social decision-  
438 making network that regulate male aggression, and levels of VP release help determine  
439 individual variation in boldness during agonistic encounters. This hypothesis must be taken with  
440 caution, however, as a possible alternate hypothesis also exists, in that the extensive testing  
441 involved in determining measures of boldness could have produced long-lasting changes to VP  
442 neuronal activity. Further research will be required to help differentiate between these  
443 possibilities.

444

## 445 **Acknowledgements**

446 LAO acknowledge that Stanford University resides on the ancestral and unceded land of  
447 the Muwekma Ohlone Tribe.

448

## 449 **Funding**

450 We gratefully acknowledge support from Rhodes College and the James T. and Valeria  
451 B. Robertson Chair in Biological Sciences to DK and the National Institutes of Health  
452 [DP2HD102042] to LAO. LAO is New York Stem Cell Foundation – Robertson Investigator.

453

#### 454 **Declaration of competing interest**

455 The authors have no competing interest to declare.

456

#### 457 **Data Accessibility**

458 Data from the analyses in this manuscript can be found at

459 <https://doi.org/10.6084/m9.figshare.16607780>.

460

#### 461 **References**

- 462 Adriaenssens, B., Johnsson, J.I., 2011. Shy trout grow faster: exploring links between  
463 personality and fitness-related traits in the wild. *Behav. Ecol.* 22, 135–143.  
464 <https://doi.org/10.1093/beheco/arq185>
- 465 Albers, H.E., 2015. Species, sex and individual differences in the vasotocin/vasopressin system:  
466 Relationship to neurochemical signaling in the social behavior neural network. *Front.*  
467 *Neuroendocrinol.* <https://doi.org/10.1016/j.yfrne.2014.07.001>
- 468 Alfonso, S., Sadoul, B., Gesto, M., Joassard, L., Chatain, B., Geffroy, B., Bégout, M.-L., 2019.  
469 Coping styles in European sea bass: The link between boldness, stress response and  
470 neurogenesis. *Physiol. Behav.* 207, 76–85.  
471 <https://doi.org/https://doi.org/10.1016/j.physbeh.2019.04.020>
- 472 Ballew, N.G., Mittelbach, G.G., Scribner, K.T., 2017. Fitness consequences of boldness in  
473 juvenile and adult largemouth bass. *Am. Nat.* 189, 396–406.  
474 <https://doi.org/10.1086/690909>
- 475 Baugh, A.T., Schaper, S. V, Hau, M., Cockrem, J.F., de Goede, P., Oers, K. van, 2012.  
476 Corticosterone responses differ between lines of great tits (*Parus major*) selected for  
477 divergent personalities. *Gen. Comp. Endocrinol.* 175, 488–494.  
478 <https://doi.org/https://doi.org/10.1016/j.ygcen.2011.12.012>
- 479 Benjamini, Y., Hochberg, Y., 1995. Controlling the False Discovery Rate: A Practical and

- 480 Powerful Approach to Multiple Testing. *J. R. Stat. Soc. Ser. B* 57, 289–300.  
481 <https://doi.org/10.1111/j.2517-6161.1995.tb02031.x>
- 482 Brown, C., Braithwaite, V.A., 2004. Size matters: a test of boldness in eight populations of the  
483 poeciliid *Brachyraphis episcopi*. *Anim. Behav.* 68, 1325–1329.  
484 <https://doi.org/https://doi.org/10.1016/j.anbehav.2004.04.004>
- 485 Campos, S.M., Rojas, V., Wilczynski, W., 2020. Arginine vasotocin impacts chemosensory  
486 behavior during social interactions of *Anolis carolinensis* lizards. *Horm. Behav.* 124,  
487 104772. <https://doi.org/https://doi.org/10.1016/j.yhbeh.2020.104772>
- 488 Cao, R., Anderson, F.E., Jung, Y.J., Dziema, H., Obrietan, K., 2011. Circadian regulation of  
489 mammalian target of rapamycin signaling in the mouse suprachiasmatic nucleus.  
490 *Neuroscience* 181, 79–88. <https://doi.org/10.1016/j.neuroscience.2011.03.005>
- 491 Carter, C.S., 2017. The oxytocin-vasopressin pathway in the context of love and fear. *Front.*  
492 *Endocrinol. (Lausanne)*. <https://doi.org/10.3389/fendo.2017.00356>
- 493 Colléter, M., Brown, C., 2011. Personality traits predict hierarchy rank in male rainbowfish social  
494 groups. *Anim. Behav.* 81, 1231–1237.  
495 <https://doi.org/https://doi.org/10.1016/j.anbehav.2011.03.011>
- 496 Cornett, L.E., Kang, S.W., Kuenzel, W.J., 2013. A possible mechanism contributing to the  
497 synergistic action of vasotocin (VT) and corticotropin-releasing hormone (CRH) receptors  
498 on corticosterone release in birds. *Gen. Comp. Endocrinol.* 188, 46–53.  
499 <https://doi.org/https://doi.org/10.1016/j.ygcen.2013.02.032>
- 500 Delville, Y., Mansour, K.M., Ferris, C.F., 1996. Testosterone facilitates aggression by  
501 modulating vasopressin receptors in the hypothalamus. *Physiol. Behav.* 60, 25–29.  
502 [https://doi.org/https://doi.org/10.1016/0031-9384\(95\)02246-5](https://doi.org/https://doi.org/10.1016/0031-9384(95)02246-5)
- 503 Dunham, L.A., Wilczynski, W., 2014. Arginine vasotocin, steroid hormones and social behavior  
504 in the green anole lizard (*Anolis carolinensis*). *J. Exp. Biol.* 217, 3670–3676.  
505 <https://doi.org/10.1242/jeb.107854>
- 506 Félix, A.S., Cardoso, S.D., Roleira, A., Oliveira, R.F., 2020. Forebrain transcriptional response  
507 to transient changes in circulating androgens in a cichlid fish. *G3 Genes, Genomes, Genet.*  
508 10, 1971–1982. <https://doi.org/10.1534/g3.119.400947>
- 509 Fuxjager, M.J., Marler, C.A., 2010. How and why the winner effect forms: Influences of contest  
510 environment and species differences. *Behav. Ecol.* 21, 37–45.  
511 <https://doi.org/10.1093/beheco/arp148>
- 512 Goodson, J.L., Evans, A.K., 2004. Neural responses to territorial challenge and nonsocial stress  
513 in male song sparrows: Segregation, integration, and modulation by a vasopressin V 1  
514 antagonist. *Horm. Behav.* 46, 371–381. <https://doi.org/10.1016/j.yhbeh.2004.02.008>
- 515 Goodson, J.L., Evans, A.K., Wang, Y., 2006. Neuropeptide binding reflects convergent and  
516 divergent evolution in species-typical group sizes. *Horm. Behav.* 50, 223–236.  
517 <https://doi.org/10.1016/j.yhbeh.2006.03.005>
- 518 Goodson, J.L., Kabelik, D., 2009. Dynamic limbic networks and social diversity in vertebrates:  
519 From neural context to neuromodulatory patterning. *Front. Neuroendocrinol.*  
520 <https://doi.org/10.1016/j.yfrne.2009.05.007>
- 521 Goodson, J.L., Wang, Y., 2006. Valence-sensitive neurons exhibit divergent functional profiles

- 522 in gregarious and asocial species. Proc. Natl. Acad. Sci. 103, 17013 LP – 17017.  
523 <https://doi.org/10.1073/pnas.0606278103>
- 524 Greenberg, N., Crews, D., 1990. Endocrine and behavioral responses to aggression and social  
525 dominance in the green anole lizard, *Anolis carolinensis*. Gen. Comp. Endocrinol. 77, 246–  
526 255. [https://doi.org/https://doi.org/10.1016/0016-6480\(90\)90309-A](https://doi.org/https://doi.org/10.1016/0016-6480(90)90309-A)
- 527 Greenwood, A.K., Wark, A.R., Fernald, R.D., Hofmann, H.A., 2008. Expression of arginine  
528 vasotocin in distinct preoptic regions is associated with dominant and subordinate  
529 behaviour in an African cichlid fish. Proc. R. Soc. B Biol. Sci. 275, 2393–2402.  
530 <https://doi.org/10.1098/rspb.2008.0622>
- 531 Hartline, J.T., Smith, A.N., Kabelik, D., 2017. Serotonergic activation during courtship and  
532 aggression in the brown anole, *Anolis sagrei*. PeerJ 2017, e3331.  
533 <https://doi.org/10.7717/peerj.3331>
- 534 Hattori, T., Wilczynski, W., 2009. Comparison of arginine vasotocin immunoreactivity differences  
535 in dominant and subordinate green anole lizards. Physiol. Behav. 96, 104–107.  
536 <https://doi.org/10.1016/j.physbeh.2008.09.010>
- 537 Kabelik, D., 2006. Neural mechanisms underlying the effects of testosterone on aggressive  
538 behavior in the tree lizard, *Urosaurus ornatus*. ProQuest Diss. Theses. Arizona State  
539 University, Ann Arbor.
- 540 Kabelik, D., Alix, V.C., Burford, E.R., Singh, L.J., 2013. Aggression- and sex-induced neural  
541 activity across vasotocin populations in the brown anole. Horm. Behav. 63, 437–446.  
542 <https://doi.org/10.1016/j.yhbeh.2012.11.016>
- 543 Kabelik, D., Alix, V.C., Singh, L.J., Johnson, A.L., Choudhury, S.C., Elbaum, C.C., Scott, M.R.,  
544 2014. Neural activity in catecholaminergic populations following sexual and aggressive  
545 interactions in the brown anole, *Anolis sagrei*. Brain Res. 1553, 41–58.  
546 <https://doi.org/10.1016/j.brainres.2014.01.026>
- 547 Kabelik, D., Crews, D., 2017. Hormones, Brain, and Behavior in Reptiles, in: Hormones, Brain  
548 and Behavior: Third Edition. pp. 171–213. [https://doi.org/10.1016/B978-0-12-803592-  
549 4.00027-4](https://doi.org/10.1016/B978-0-12-803592-4.00027-4)
- 550 Kabelik, D., Crombie, T., Moore, M.C., 2008a. Aggression frequency and intensity, independent  
551 of testosterone levels, relate to neural activation within the dorsolateral subdivision of the  
552 ventromedial hypothalamus in the tree lizard *Urosaurus ornatus*. Horm. Behav. 54, 18–27.  
553 <https://doi.org/10.1016/j.yhbeh.2007.09.022>
- 554 Kabelik, D., Hofmann, H.A., 2018. Comparative neuroendocrinology: A call for more study of  
555 reptiles! Horm. Behav. 106, 189–192. <https://doi.org/10.1016/j.yhbeh.2018.10.005>
- 556 Kabelik, D., Julien, A.R., Ramirez, D., O'Connell, L.A., 2021. Social boldness correlates with  
557 brain gene expression in male green anoles. Horm. Behav. 133, 105007.  
558 <https://doi.org/10.1016/j.yhbeh.2021.105007>
- 559 Kabelik, D., Magruder, D.S., 2014. Involvement of different mesotocin (oxytocin homologue)  
560 populations in sexual and aggressive behaviours of the brown anole. Biol. Lett. 10,  
561 20140566. <https://doi.org/10.1098/rsbl.2014.0566>
- 562 Kabelik, D., Weiss, S.L., Moore, M.C., 2008b. Steroid hormones alter neuroanatomy and  
563 aggression independently in the tree lizard. Physiol. Behav. 93, 492–501.  
564 <https://doi.org/10.1016/j.physbeh.2007.10.008>



- 565 Kabelik, D., Weiss, S.L., Moore, M.C., 2008c. Arginine vasotocin (AVT) immunoreactivity relates  
566 to testosterone but not territorial aggression in the tree lizard, *Urosaurus ornatus*. *Brain*.  
567 *Behav. Evol.* 72, 283–294. <https://doi.org/10.1159/000174248>
- 568 Kabelik, D., Weiss, S.L., Moore, M.C., 2006. Steroid hormone mediation of limbic brain plasticity  
569 and aggression in free-living tree lizards, *Urosaurus ornatus*. *Horm. Behav.* 49, 587–597.  
570 <https://doi.org/10.1016/j.yhbeh.2005.12.004>
- 571 Kabelik, D., Weitekamp, C.A., Choudhury, S.C., Hartline, J.T., Smith, A.N., Hofmann, H.A.,  
572 2018. Neural activity in the social decision-making network of the brown anole during  
573 reproductive and agonistic encounters. *Horm. Behav.* 106, 178–188.  
574 <https://doi.org/10.1016/j.yhbeh.2018.06.013>
- 575 Kanitz, E., Tuchscherer, M., Otten, W., Tuchscherer, A., Zebunke, M., Puppe, B., 2019. Coping  
576 style of pigs is associated with different behavioral, neurobiological and immune responses  
577 to stressful challenges. *Front. Behav. Neurosci.* <https://doi.org/10.3389/fnbeh.2019.00173>
- 578 Kawakami, N., Otubo, A., Maejima, S., Talukder, A.H., Satoh, K., Oti, T., Takanami, K., Ueda,  
579 Y., Itoi, K., Morris, J.F., Sakamoto, T., Sakamoto, H., 2021. Variation of pro-vasopressin  
580 processing in parvocellular and magnocellular neurons in the paraventricular nucleus of the  
581 hypothalamus: Evidence from the vasopressin-related glycopeptide copeptin. *J. Comp.*  
582 *Neurol.* 529, 1372–1390. <https://doi.org/10.1002/cne.25026>
- 583 Kelly, A.M., Goodson, J.L., 2014a. Hypothalamic oxytocin and vasopressin neurons exert sex-  
584 specific effects on pair bonding, gregariousness, and aggression in finches. *Proc. Natl.*  
585 *Acad. Sci. U. S. A.* 111, 6069–6074. <https://doi.org/10.1073/pnas.1322554111>
- 586 Kelly, A.M., Goodson, J.L., 2014b. Social functions of individual vasopressin-oxytocin cell  
587 groups in vertebrates: What do we really know? *Front. Neuroendocrinol.* 35, 512–529.  
588 <https://doi.org/10.1016/j.yfrne.2014.04.005>
- 589 Kelly, A.M., Goodson, J.L., 2014c. Personality is tightly coupled to vasopressin-oxytocin neuron  
590 activity in a gregarious finch. *Front. Behav. Neurosci.*  
591 <https://doi.org/10.3389/fnbeh.2014.00055>
- 592 Kelly, A.M., Kingsbury, M.A., Hoffbuhr, K., Schrock, S.E., Waxman, B., Kabelik, D., Thompson,  
593 R.R., Goodson, J.L., 2011. Vasotocin neurons and septal V1a-like receptors potently  
594 modulate songbird flocking and responses to novelty. *Horm. Behav.* 60, 12–21.  
595 <https://doi.org/10.1016/j.yhbeh.2011.01.012>
- 596 Ketterson, E.D., Nolan Val, J., 1999. Adaptation, exaptation, and constraint: A hormonal  
597 perspective. *Am. Nat.* 154, S4–S25. <https://doi.org/10.1086/303280>
- 598 Klingebiel, M., Dinekov, M., Köhler, C., 2017. Analysis of ribosomal protein S6 baseline  
599 phosphorylation and effect of tau pathology in the murine brain and human hippocampus.  
600 *Brain Res.* 1659, 121–135. <https://doi.org/10.1016/j.brainres.2017.01.016>
- 601 Knight, Z.A., Tan, K., Birsoy, K., Schmidt, S., Garrison, J.L., Wysocki, R.W., Emiliano, A.,  
602 Ekstrand, M.I., Friedman, J.M., 2012. Molecular profiling of activated neurons by  
603 phosphorylated ribosome capture. *Cell* 151, 1126–1137.  
604 <https://doi.org/10.1016/j.cell.2012.10.039>
- 605 Koolhaas, J.M., de Boer, S.F., Coppens, C.M., Buwalda, B., 2010. Neuroendocrinology of  
606 coping styles: Towards understanding the biology of individual variation. *Front.*  
607 *Neuroendocrinol.* 31, 307–321. <https://doi.org/10.1016/j.yfrne.2010.04.001>

- 608 Korzan, W.J., Summers, C.H., 2004. Serotonergic response to social stress and artificial social  
609 sign stimuli during paired interactions between male *Anolis carolinensis*. *Neuroscience*  
610 123, 835–845. <https://doi.org/https://doi.org/10.1016/j.neuroscience.2003.11.005>
- 611 Korzan, W.J., Summers, T.R., Ronan, P.J., Renner, K.J., Summers, C.H., 2001. The role of  
612 monoaminergic nuclei during aggression and sympathetic social signaling. *Brain. Behav.*  
613 *Evol.* 57, 317–327. <https://doi.org/10.1159/000047250>
- 614 Larson, E.T., Summers, C.H., 2001. Serotonin reverses dominant social status. *Behav. Brain*  
615 *Res.* 121, 95–102. [https://doi.org/https://doi.org/10.1016/S0166-4328\(00\)00393-4](https://doi.org/https://doi.org/10.1016/S0166-4328(00)00393-4)
- 616 Lovern, M.B., Holmes, M.M., Wade, J., 2004. The green anole (*Anolis carolinensis*): A reptilian  
617 model for laboratory studies of reproductive morphology and behavior. *ILAR J.*  
618 <https://doi.org/10.1093/ilar.45.1.54>
- 619 Mayer, M., Shine, R., Brown, G.P., 2016. Bigger babies are bolder: effects of body size on  
620 personality of hatchling snakes. *Behaviour* 153, 313–323.  
621 <https://doi.org/https://doi.org/10.1163/1568539X-00003343>
- 622 Mont, C., Hernandez-Pliego, P., Cañete, T., Oliveras, I., Río-Álamos, C., Blázquez, G., López-  
623 Aumatell, R., Martínez-Membrives, E., Tobeña, A., Flint, J., Fernández-Teruel, A., Mott, R.,  
624 2018. Coping-style behavior identified by a survey of parent-of-origin effects in the rat. *G3*  
625 *Genes, Genomes, Genet.* 8, 3283–3291. <https://doi.org/10.1534/g3.118.200489>
- 626 Newman, S.W., 1999. The medial extended amygdala in male reproductive behavior. A node in  
627 the mammalian social behavior network. *Ann. N. Y. Acad. Sci.* 877, 242–257.  
628 <https://doi.org/10.1111/j.1749-6632.1999.tb09271.x>
- 629 O'Connell, L.A., Hofmann, H.A., 2012. Evolution of a vertebrate social decision-making network.  
630 *Science* (80-. ). 336, 1154–1157. <https://doi.org/10.1126/science.1218889>
- 631 O'Connell, L.A., Hofmann, H.A., 2011. The vertebrate mesolimbic reward system and social  
632 behavior network: A comparative synthesis. *J. Comp. Neurol.* 519, 3599–3639.  
633 <https://doi.org/10.1002/cne.22735>
- 634 Panzica, G.C., Plumari, L., García-Ojeda, E., Deviche, P., 1999. Central vasotocin-  
635 immunoreactive system in a male passerine bird (*Junco hyemalis*). *J. Comp. Neurol.* 409,  
636 105–117. [https://doi.org/10.1002/\(SICI\)1096-9861\(19990621\)409:1<105::AID-  
637 CNE8>3.0.CO;2-8](https://doi.org/10.1002/(SICI)1096-9861(19990621)409:1<105::AID-CNE8>3.0.CO;2-8)
- 638 Putman, B.J., Azure, K.R., Swierk, L., 2019. Dewlap size in male water anoles associates with  
639 consistent inter-individual variation in boldness. *Curr. Zool.* 65, 189–195.  
640 <https://doi.org/10.1093/cz/zoy041>
- 641 Qu, J., Fletcher, Q.E., Réale, D., Li, W., Zhang, Y., 2018. Independence between coping style  
642 and stress reactivity in plateau pika. *Physiol. Behav.* 197, 1–8.  
643 <https://doi.org/https://doi.org/10.1016/j.physbeh.2018.09.007>
- 644 Réale, D., Dingemanse, N.J., Kazem, A.J.N., Wright, J., 2010. Evolutionary and ecological  
645 approaches to the study of personality. *Philos. Trans. R. Soc. B Biol. Sci.* 365, 3937–3946.  
646 <https://doi.org/10.1098/rstb.2010.0222>
- 647 Reaney, L.T., Backwell, P.R.Y., 2007. Risk-taking behavior predicts aggression and mating  
648 success in a fiddler crab. *Behav. Ecol.* 18, 521–525.  
649 <https://doi.org/10.1093/beheco/arm014>



- 650 Rosen, G., O'Bryant, E., Matthews, J., Zacharewski, T., Wade, J., 2002. Distribution of  
651 androgen receptor mRNA expression and immunoreactivity in the brain of the green anole  
652 lizard. *J. Neuroendocrinol.* 14, 19–28. <https://doi.org/10.1046/j.0007-1331.2001.00735.x>
- 653 Scherer, U., Kuhnhardt, M., Schuett, W., 2017. Different or alike? Female rainbow kribbs choose  
654 males of similar consistency and dissimilar level of boldness. *Anim. Behav.* 128, 117–124.  
655 <https://doi.org/https://doi.org/10.1016/j.anbehav.2017.04.007>
- 656 Sih, A., Bell, A., Johnson, J.C., 2004. Behavioral syndromes: an ecological and evolutionary  
657 overview. *Trends Ecol. Evol.* 19, 372–378. <https://doi.org/10.1016/j.tree.2004.04.009>
- 658 Sinervo, B., Miles, D.B., Frankino, W.A., Klukowski, M., DeNardo, D.F., 2000. Testosterone,  
659 endurance, and Darwinian fitness: Natural and sexual selection on the physiological bases  
660 of alternative male behaviors in side-blotched lizards. *Horm. Behav.* 38, 222–233.  
661 <https://doi.org/10.1006/hbeh.2000.1622>
- 662 Sluyter, F., Korte, S.M., Bohus, B., Van Oortmerssen, G.A., 1996. Behavioral stress response of  
663 genetically selected aggressive and nonaggressive wild house mice in the shock-  
664 probe/defensive burying test. *Pharmacol. Biochem. Behav.* 54, 113–116.  
665 [https://doi.org/10.1016/0091-3057\(95\)02164-7](https://doi.org/10.1016/0091-3057(95)02164-7)
- 666 Smith, A.N., Kabelik, D., 2017. The effects of dopamine receptor 1 and 2 agonists and  
667 antagonists on sexual and aggressive behaviors in male green anoles. *PLoS One* 12.  
668 <https://doi.org/10.1371/journal.pone.0172041>
- 669 Smith, B.R., Blumstein, D.T., 2010. Behavioral types as predictors of survival in Trinidadian  
670 guppies (*Poecilia reticulata*). *Behav. Ecol.* 21, 919–926.  
671 <https://doi.org/10.1093/beheco/arq084>
- 672 Taborsky, M., Hofmann, H.A., Beery, A.K., Blumstein, D.T., Hayes, L.D., Lacey, E.A., Martins,  
673 E.P., Phelps, S.M., Solomon, N.G., Rubenstein, D.R., 2015. Taxon matters: promoting  
674 integrative studies of social behavior: NESCent Working Group on Integrative Models of  
675 Vertebrate Sociality: Evolution, Mechanisms, and Emergent Properties. *Trends Neurosci.*  
676 38, 189–191. <https://doi.org/10.1016/J.TINS.2015.01.004>
- 677 Terranova, J.I., Ferris, C.F., Albers, H.E., 2017. Sex differences in the regulation of offensive  
678 aggression and dominance by Arginine-vasopressin. *Front. Endocrinol. (Lausanne)*.  
679 <https://doi.org/10.3389/fendo.2017.00308>
- 680 Thompson, R.R., Walton, J.C., 2004. Peptide effects on social behavior: Effects of vasotocin  
681 and isotocin on social approach behavior in male goldfish (*Carassius auratus*). *Behav.*  
682 *Neurosci.* <https://doi.org/10.1037/0735-7044.118.3.620>
- 683 Thörnqvist, P.-O., McCarrick, S., Ericsson, M., Roman, E., Winberg, S., 2019. Bold zebrafish  
684 (*Danio rerio*) express higher levels of delta opioid and dopamine D2 receptors in the brain  
685 compared to shy fish. *Behav. Brain Res.* 359, 927–934.  
686 <https://doi.org/https://doi.org/10.1016/j.bbr.2018.06.017>
- 687 Tokarz, R.R., 1995. Importance of androgens in male territorial acquisition in the lizard *Anolis*  
688 *sagrei*: an experimental test. *Anim. Behav.* 49, 661–669. [https://doi.org/10.1016/0003-3472\(95\)80199-5](https://doi.org/10.1016/0003-3472(95)80199-5)
- 690 Tudorache, C., Slabbekoorn, H., Robbers, Y., Hin, E., Meijer, J.H., Spaink, H.P., Schaaf,  
691 M.J.M., 2018. Biological clock function is linked to proactive and reactive personality types.  
692 *BMC Biol.* 16, 148. <https://doi.org/10.1186/s12915-018-0618-0>

- 693 Veenema, A.H., Beiderbeck, D.I., Lukas, M., Neumann, I.D., 2010. Distinct correlations of  
694 vasopressin release within the lateral septum and the bed nucleus of the stria terminalis  
695 with the display of intermale aggression. *Horm. Behav.* 58, 273–281.  
696 <https://doi.org/https://doi.org/10.1016/j.yhbeh.2010.03.006>
- 697 Veenema, A.H., Koolhaas, J.M., De Kloet, E.R., 2004. Basal and stress-induced differences in  
698 HPA axis, 5-HT responsiveness, and hippocampal cell proliferation in two mouse lines.  
699 *Ann. N. Y. Acad. Sci.* 1018, 255–265. <https://doi.org/10.1196/annals.1296.030>
- 700 Veenema, A.H., Meijer, O.C., De Kloet, E.R., Koolhaas, J.M., Bohus, B.G., 2003. Differences in  
701 basal and stress-induced HPA regulation of wild house mice selected for high and low  
702 aggression. *Horm. Behav.* 43, 197–204. [https://doi.org/10.1016/S0018-506X\(02\)00013-2](https://doi.org/10.1016/S0018-506X(02)00013-2)
- 703 Walton, J.C., Waxman, B., Hoffbuhr, K., Kennedy, M., Beth, E., Scangos, J., Thompson, R.R.,  
704 2010. Behavioral effects of hindbrain vasotocin in goldfish are seasonally variable but not  
705 sexually dimorphic. *Neuropharmacology* 58, 126–134.  
706 <https://doi.org/10.1016/j.neuropharm.2009.07.018>
- 707 Watt, M.J., Forster, G.L., Korzan, W.J., Renner, K.J., Summers, C.H., 2007. Rapid  
708 neuroendocrine responses evoked at the onset of social challenge. *Physiol. Behav.* 90,  
709 567–575. <https://doi.org/https://doi.org/10.1016/j.physbeh.2006.11.006>
- 710 Weiss, S.L., Moore, M.C., 2004. Activation of aggressive behavior by progesterone and  
711 testosterone in male tree lizards, *Urosaurus ornatus*. *Gen. Comp. Endocrinol.* 136, 282–  
712 288. <https://doi.org/https://doi.org/10.1016/j.ygcen.2004.01.001>
- 713 Wilczynski, W., Quispe, M., Muñoz, M.I., Penna, M., 2017. Arginine vasotocin, the Social  
714 Neuropeptide of Amphibians and Reptiles. *Front. Endocrinol. (Lausanne)*. 8, 186.  
715 <https://doi.org/10.3389/fendo.2017.00186>
- 716 Woolley, S.C., Sakata, J.T., Crews, D., 2004a. Tyrosine hydroxylase expression is affected by  
717 sexual vigor and social environment in male *Cnemidophorus inornatus*. *J. Comp. Neurol.*  
718 476, 429–439. <https://doi.org/10.1002/cne.20236>
- 719 Woolley, S.C., Sakata, J.T., Crews, D., 2004b. Evolutionary insights into the regulation of  
720 courtship behavior in male amphibians and reptiles. *Physiol. Behav.* 83, 347–360.  
721 <https://doi.org/10.1016/j.physbeh.2004.08.021>
- 722 Woolley, S.C., Sakata, J.T., Gupta, A., Crews, D., 2001. Evolutionary changes in dopaminergic  
723 modulation of courtship behavior in *Cnemidophorus whiptail* lizards. *Horm. Behav.* 40,  
724 483–489. <https://doi.org/10.1006/hbeh.2001.1713>
- 725 Young, L.J., Greenberg, N., Crews, D., 1991. The effects of progesterone on sexual behavior in  
726 male green anole lizards (*Anolis carolinensis*). *Horm. Behav.* 25, 477–488.  
727 [https://doi.org/10.1016/0018-506X\(91\)90015-A](https://doi.org/10.1016/0018-506X(91)90015-A)

728

729

730 **Figure captions**

731 **Figure 1. Immunofluorescence within the SON.** VP-immunoreactive cells (A) were scored as  
732 colocalized (white arrows) or not colocalized (yellow arrows) with pS6-immunoreactive signal  
733 (B). Nonspecific signal due to the presence of blood cells was disregarded because those cells  
734 would also cause autofluorescence within the tyrosine hydroxylase (TH) layer (C; captured for a  
735 separate study). A DAPI-stained layer was also captured (D).

736

737 **Figure 2. Stability of boldness.** Boldness scores were correlated across weeks within  
738 agonistic contexts involving encounters with three separate conspecific intruder males across  
739 two separate weeks (A), as well as within reproductive contexts involving encounters with three  
740 separate pairs of conspecific females across separate weeks (B). Average boldness scores  
741 across the two weeks in the agonistic context were highly correlated with average boldness  
742 score within the reproductive context (C).

743

744 **Figure 3. Boldness of social behavior interactions relative to VP-pS6 colocalization.**

745 Average boldness scores toward males within an agonistic context (A, B) but not females within  
746 a reproductive context (C, D) correlated negatively with the percentage of VP neurons in the  
747 PVN and SON that were pS6 positive.

748

749

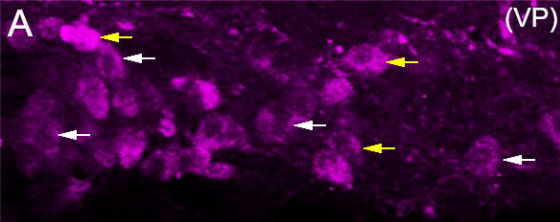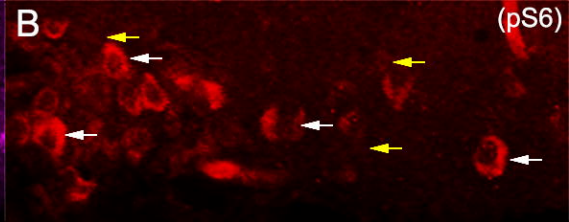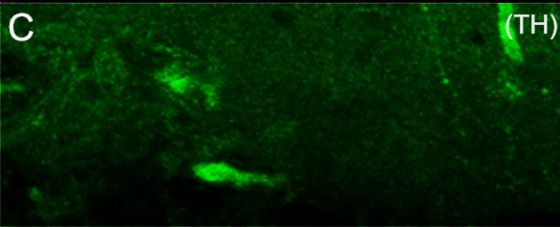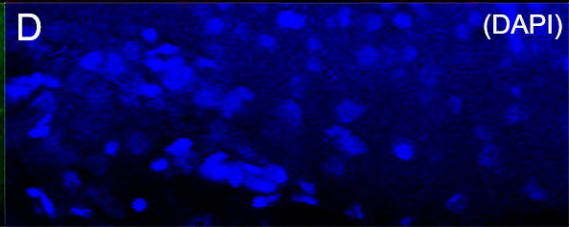

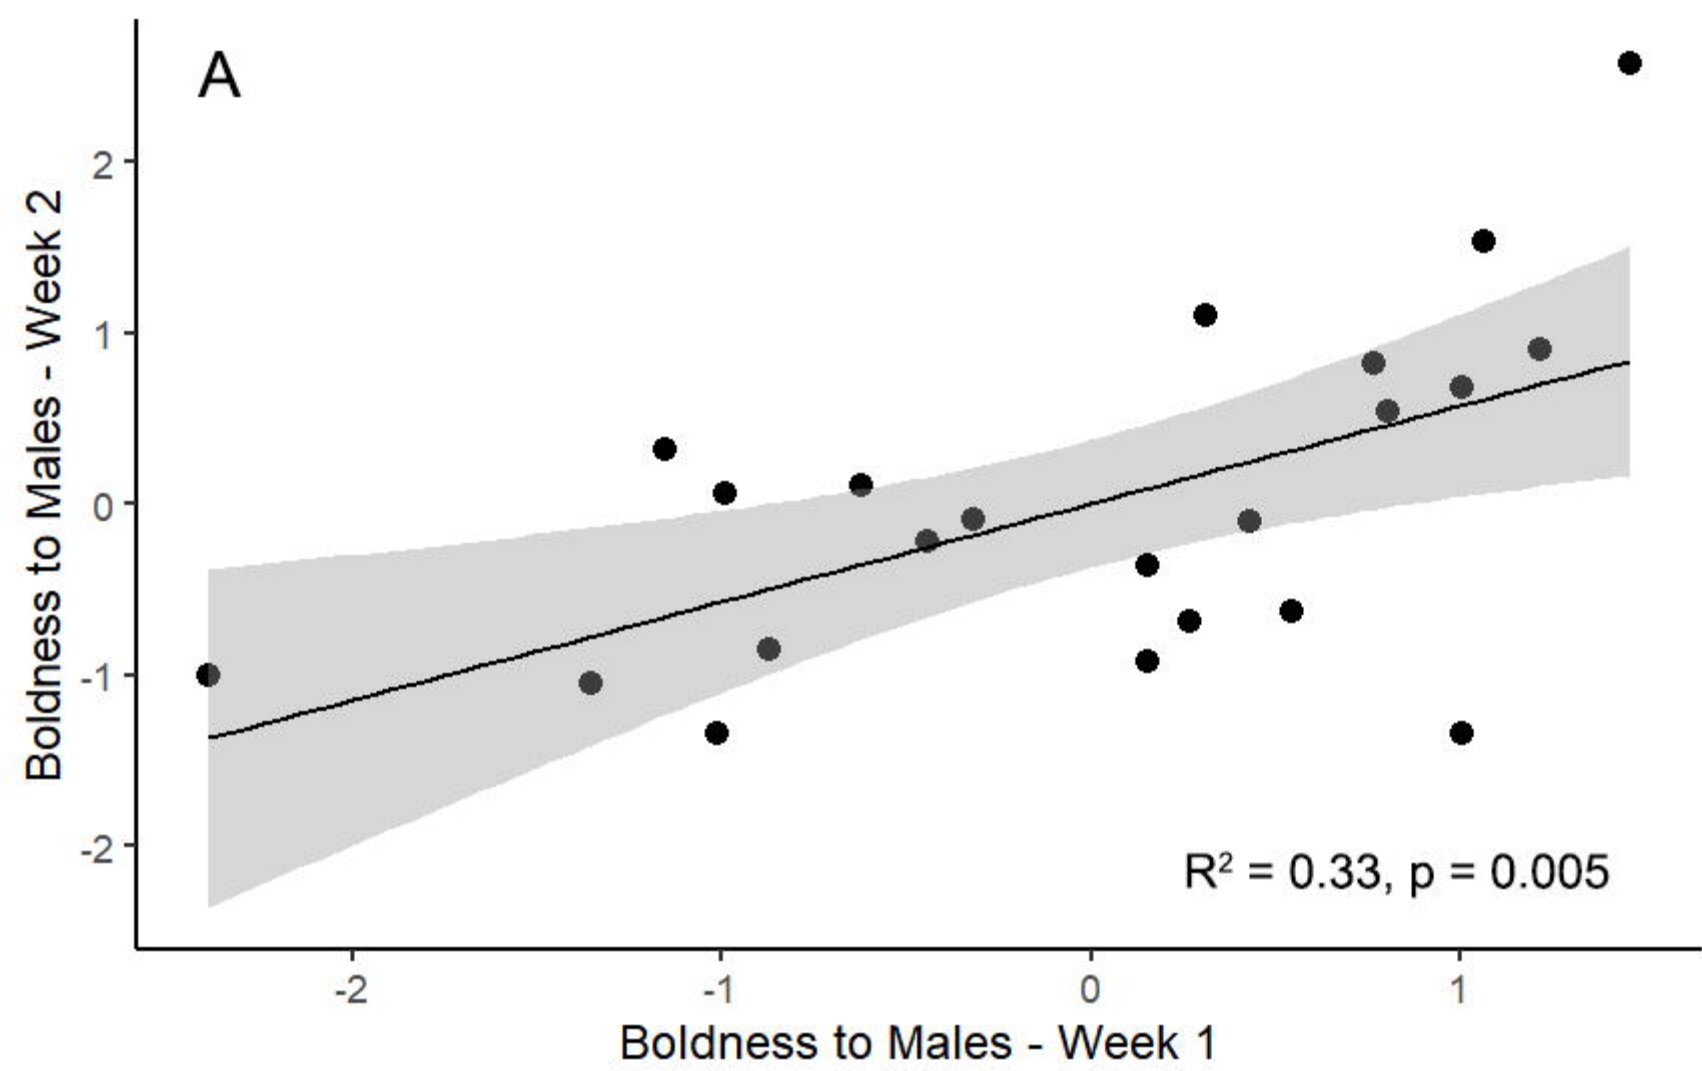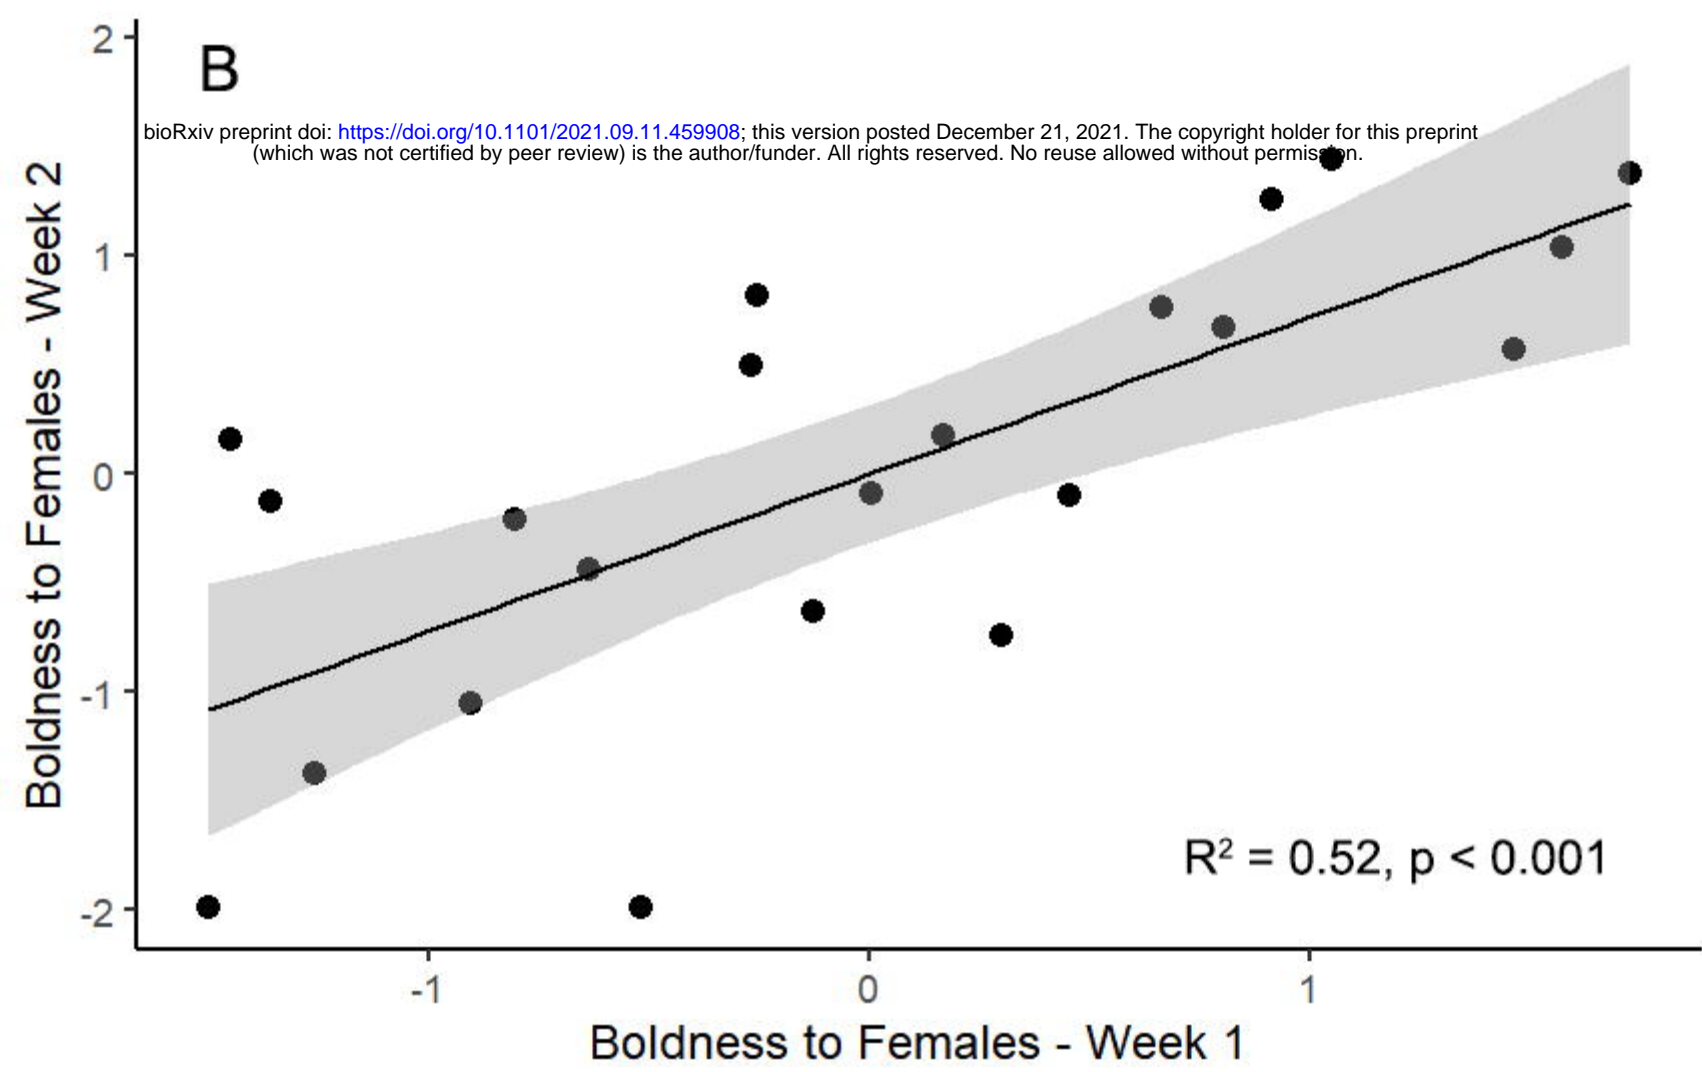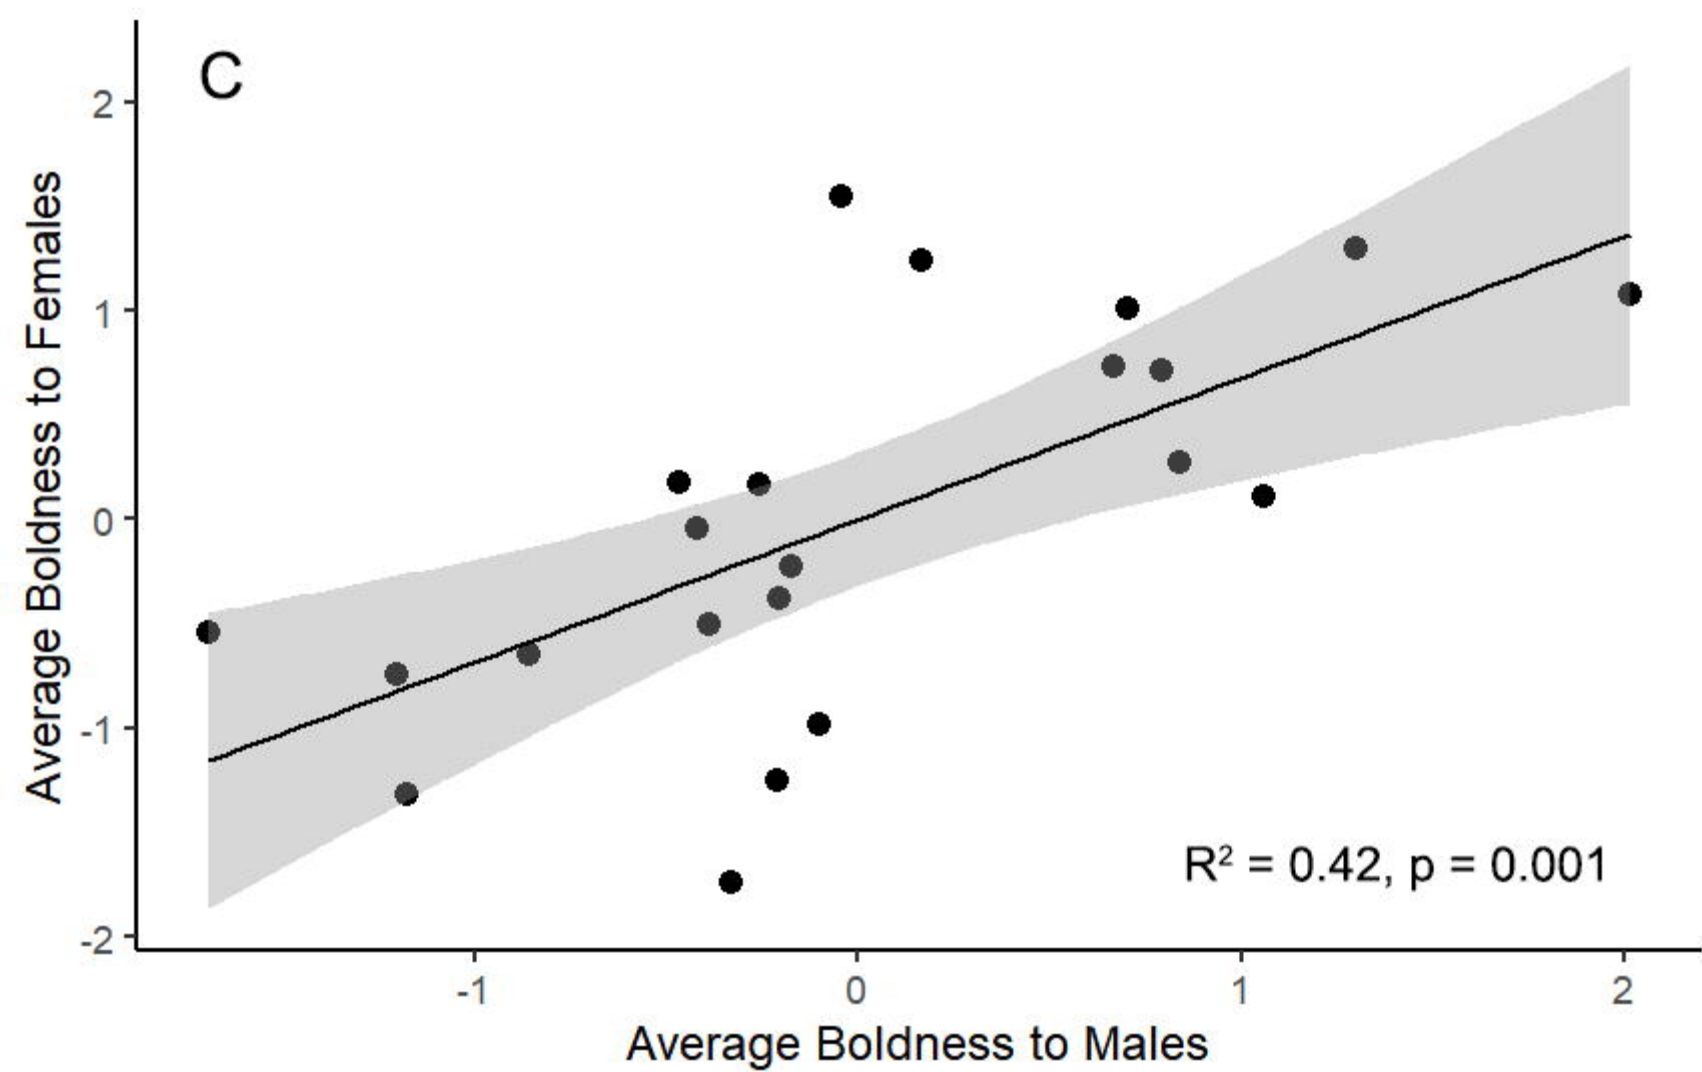



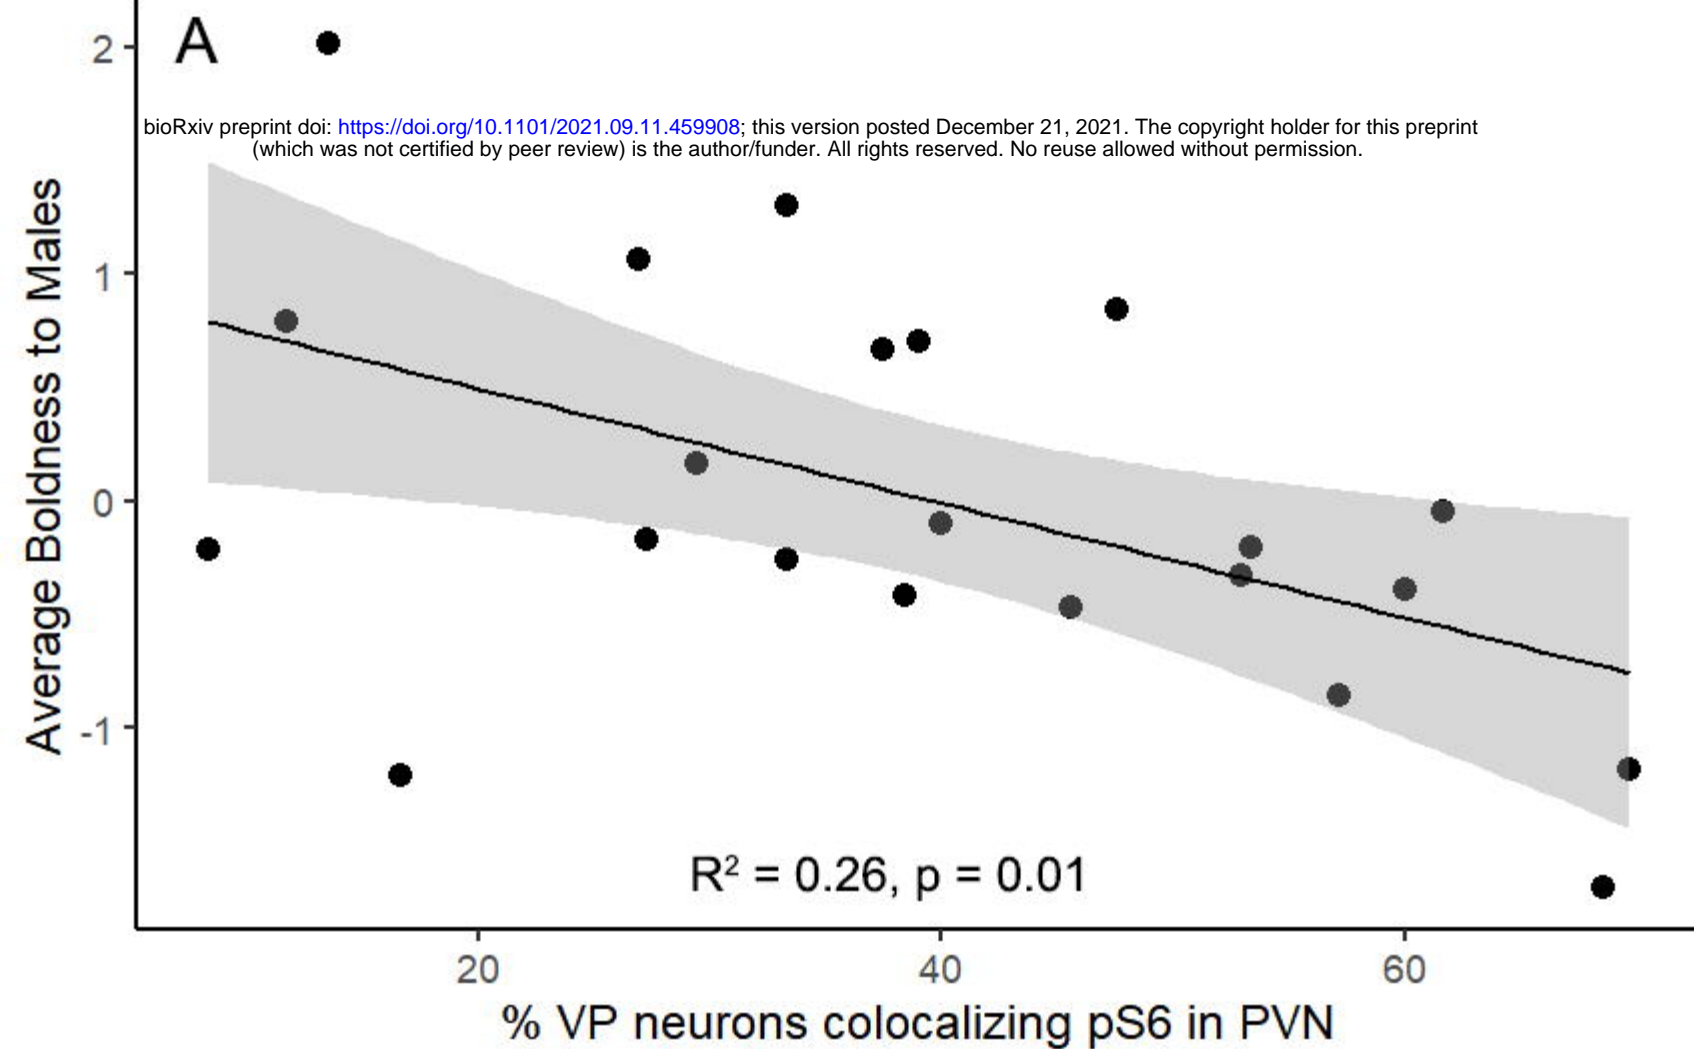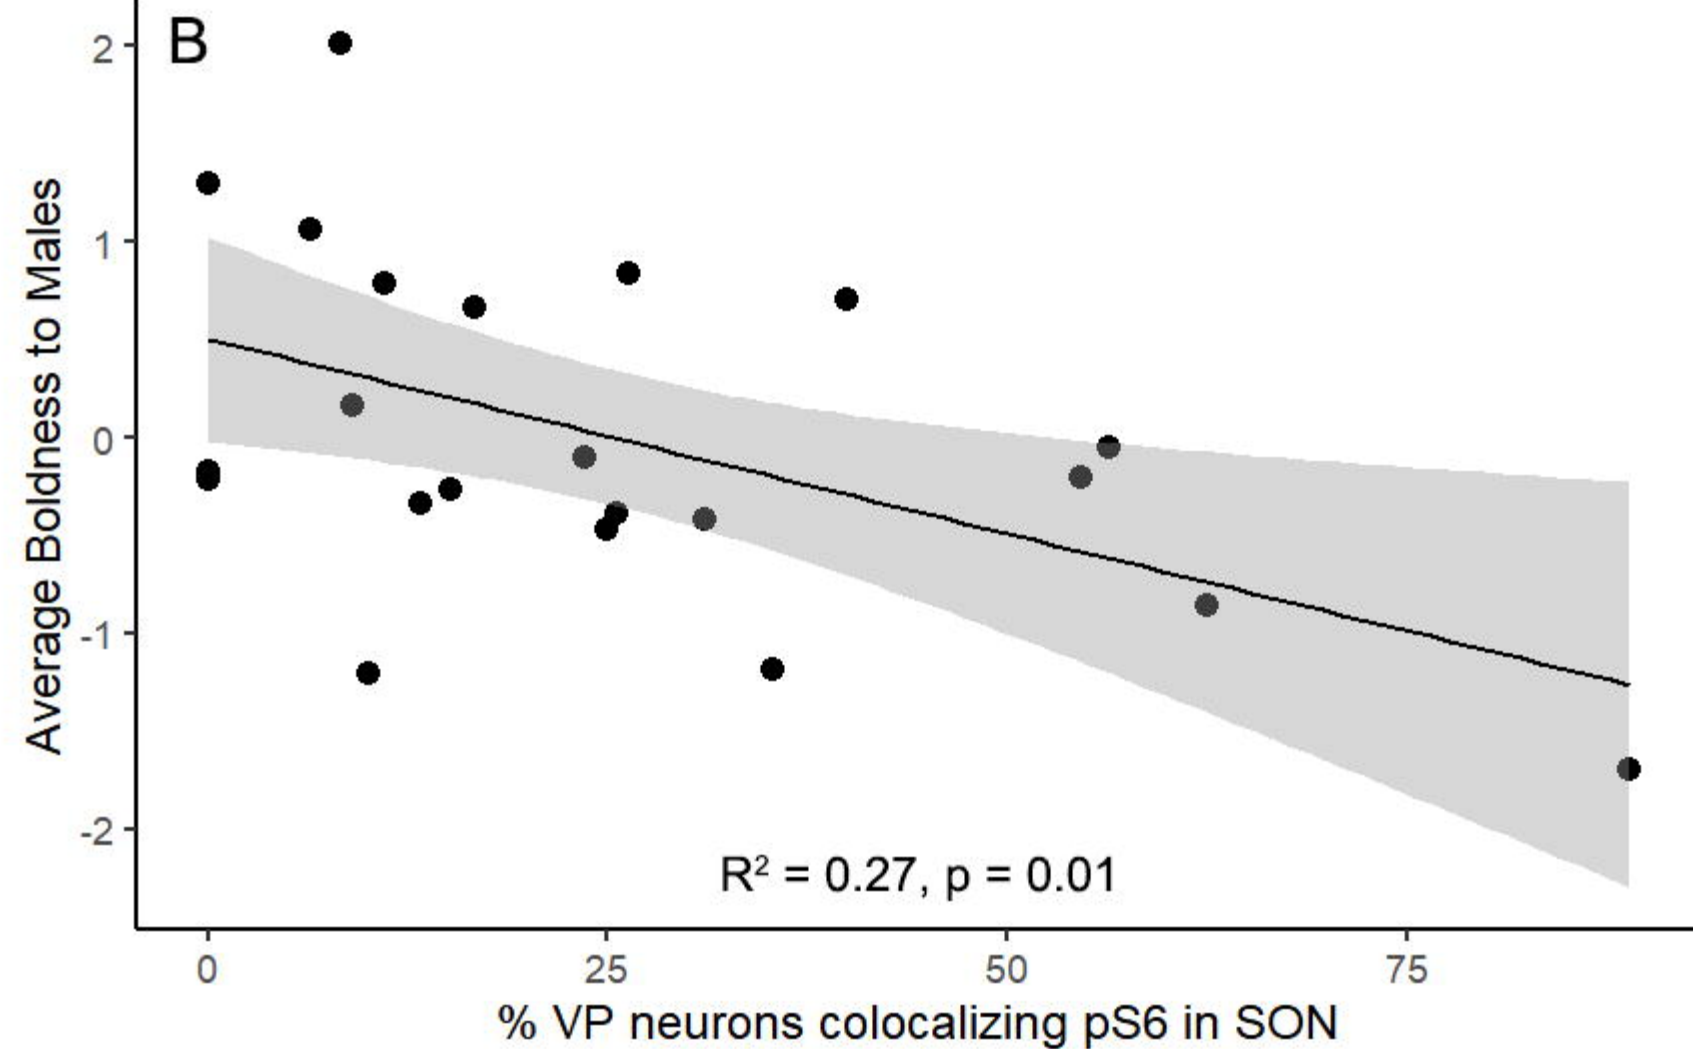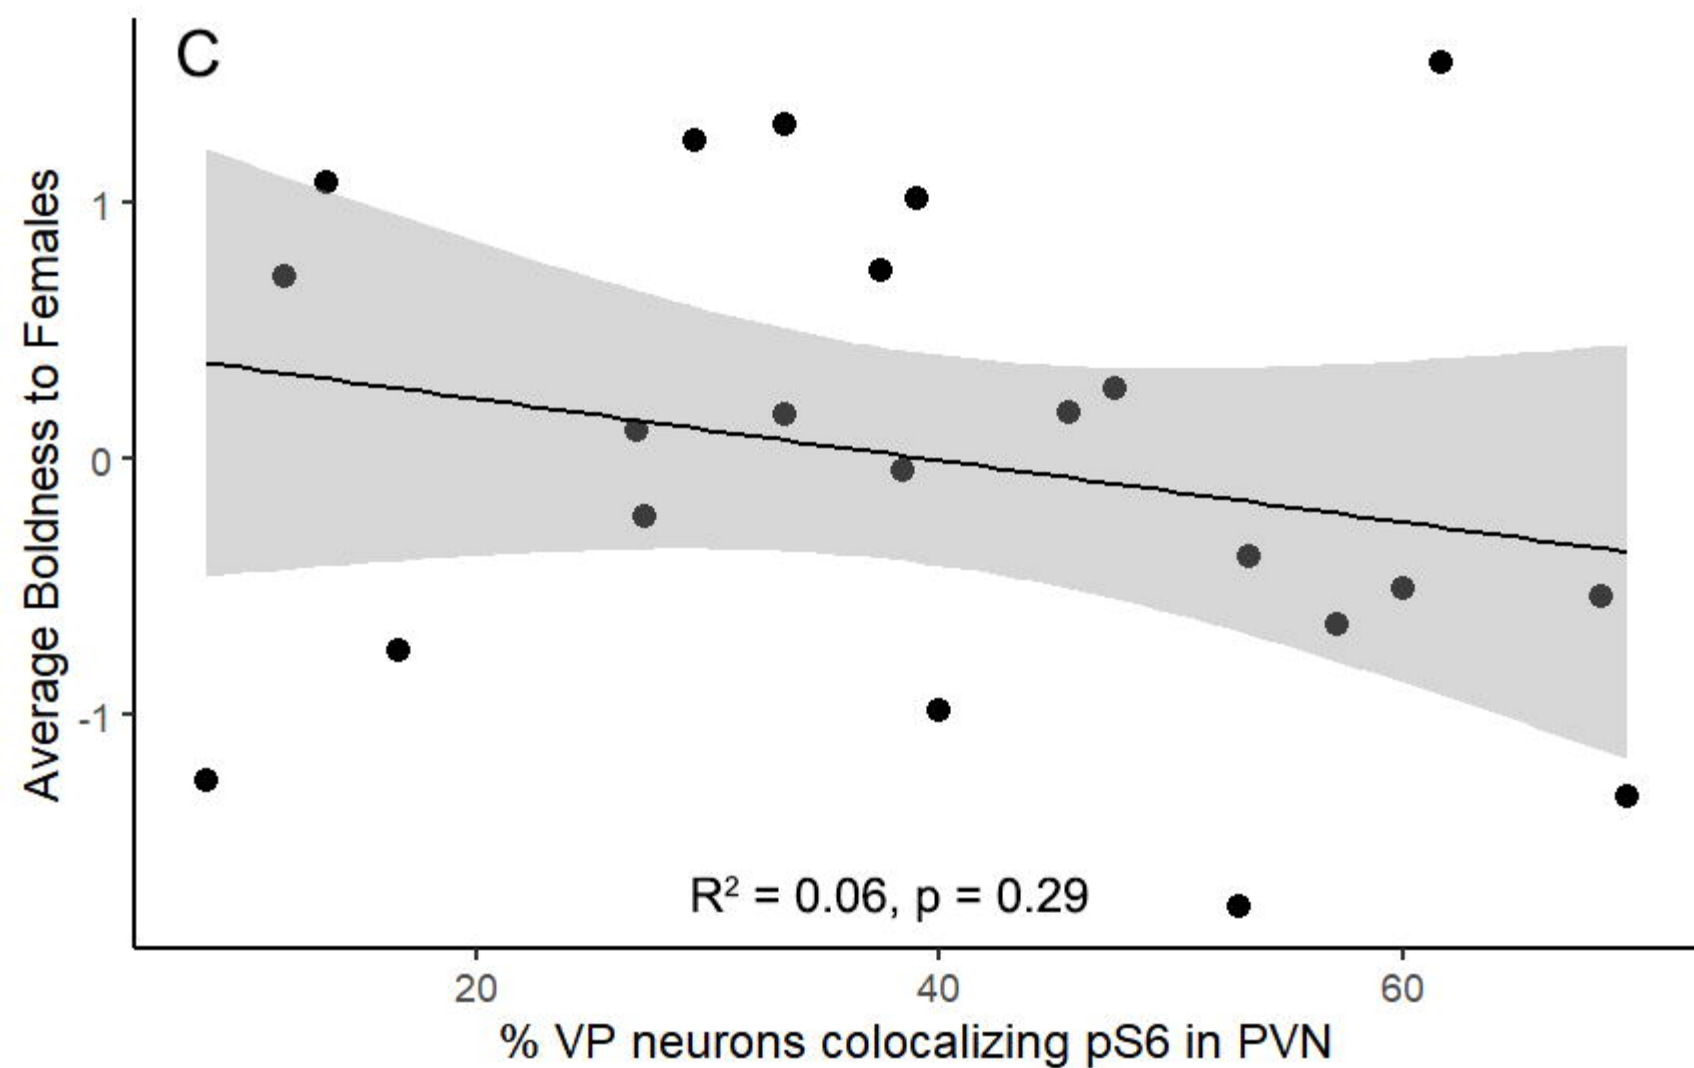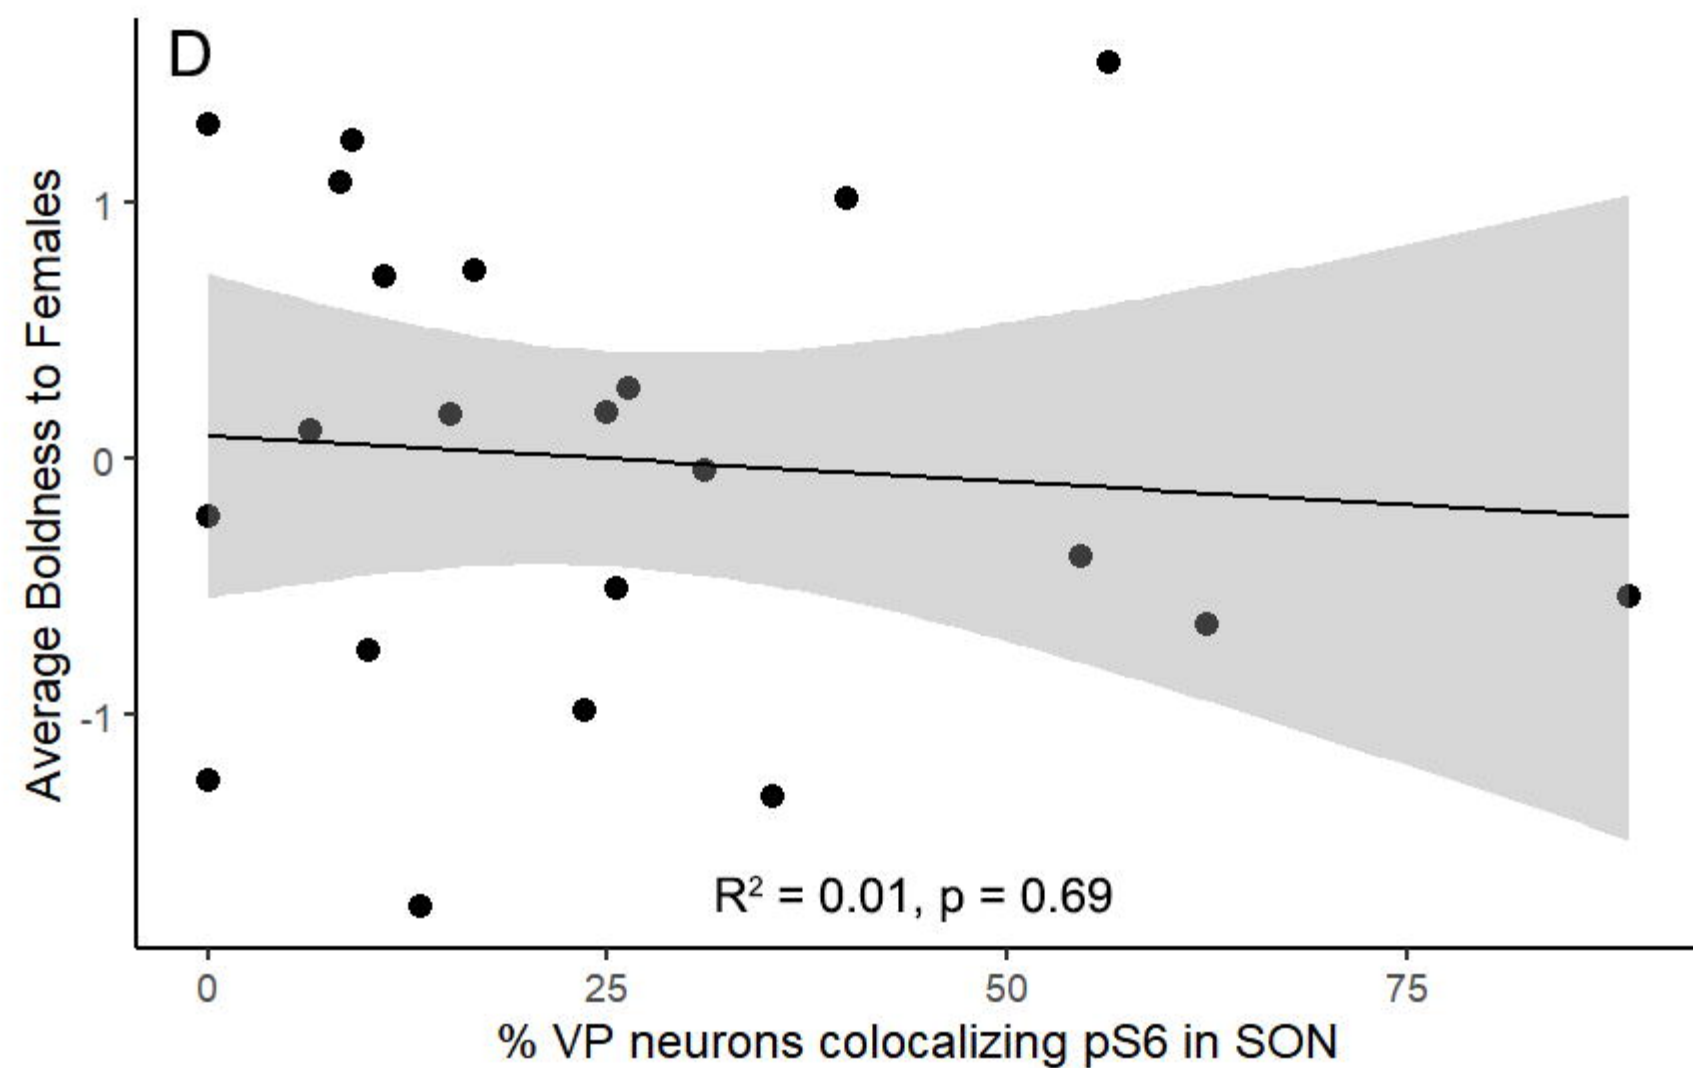

Source: https://www.biorxiv.org/content/10.1101/2021.09.11.459908v2.full.pdf
